1 **Chemical Gating of the Mechanosensitive Piezo1 Channel by Asymmetric Binding of its**  
2 **Agonist Yoda1**

3

4 Jerome J. Lacroix\*<sup>1</sup>, Wesley M. Botello-Smith<sup>2</sup> and Yun Luo<sup>2</sup>

5

6 <sup>1</sup>Graduate College of Biomedical Sciences, Western University of Health Sciences, 309 E.

7 Second St, Pomona, CA 91766

8 <sup>2</sup>College of Pharmacy, Western University of Health Sciences, 309 E. Second St, Pomona, CA

9 91766

10

11

12 **\*corresponding author:**

13 Dr. Jerome Lacroix

14 Western University of Health Sciences

15 309 E. Second St, Pomona, CA 91766

16 Tel: 909-469-8201

17 Email: [jlacroix@westernu.edu](mailto:jlacroix@westernu.edu)

18

19

20

21

22

23

24 **Abstract**

25 Piezo proteins are homotrimeric ion channels that play major roles in normal and pathological  
26 mechanotransduction signaling in mammalian organisms. Their pharmacological control hence  
27 represents a potential therapeutic avenue. Yoda1, a Piezo1-selective small molecule agonist, is  
28 the only known selective Piezo modulator. How Yoda1 selectively interacts with Piezo1 and  
29 opens its pore is unknown. Here, by engineering and characterizing chimeras, we identified a  
30 minimal region responsible for Yoda1 binding. This region is located at the interface between the  
31 pore and the putative mechanosensory domains in each subunit. By characterizing hybrid  
32 channels containing Yoda1-insensitive and Yoda1-sensitive monomers, we demonstrate that the  
33 presence of only one Yoda1-sensitive Piezo1 subunit is sufficient for chemical activation,  
34 implicating that the asymmetric binding of Yoda1 to a single subunit enables channel opening.  
35 These findings shed light onto the gating mechanisms of Piezo channels and will pave the way  
36 for the rationale design of new Piezo channels modulators.

37

## 38 **Introduction**

39 Piezo proteins are very large (~1MDa) trimeric mechanosensitive ion channels (Fig 1a) which  
40 transduce various forms of mechanical stimuli such as shear stress and membrane stretch into  
41 important biological signals. In mammals, only two Piezo isoforms named Piezo1-2 have been  
42 identified. In spite of their recent discovery, these isoforms have been implicated in a  
43 bewildering number of mechanotransduction processes including touch sensation(1-3),  
44 proprioception(4), hearing(5), vascular(6, 7) and brain development(8), blood flow sensing(9),  
45 osmotic homeostasis(10) and epithelium regulation(11, 12). Both gain-of-functions and loss-of-  
46 functions Piezo mutations are associated with human diseases such as xerocytosis(13, 14, 10,  
47 15), arthrogyrosis(16-22) and lymphedema(23). Recent studies suggest Piezo channels may also  
48 play important roles in other conditions such as sleep apnea(24) and visceral pain(25).

49 An avenue to treat these diseases would be to correct Piezo channel activity with small  
50 molecule agonists and/or antagonists. On the other hand, the availability of selective Piezo  
51 modulators would allow us to precisely determine the contribution of each Piezo isoform to  
52 complex physiological functions. Unfortunately, the current pharmacology of Piezo channels is  
53 extremely limited, with a single Piezo1-selective small molecule agonist named Yoda1(26) (Fig  
54 1b) and no known isoform-selective inhibitors. Hence, understanding how Yoda1 selectively  
55 binds and activates Piezo1 is a key step to rationally design new small molecule modulators with  
56 high selectivity.

57 Yoda1 was recently identified using a simultaneous high-throughput agonist screening on  
58 both Piezo1 and 2 isoforms. Although Piezo2 shares more than 65% of its primary amino acid  
59 sequence with Piezo1, Yoda1 possesses strict Piezo1 selectivity with no measurable modulatory  
60 effects on Piezo2 activity. The activation of Piezo1 by Yoda1 originates from the binding of

61 Yoda1 to one or more unknown binding site(s) on the Piezo1 channel(26). Based on these  
62 observations, we have generated Piezo1-Piezo2 chimeras to identify a minimal protein region  
63 responsible for Yoda1 binding selectivity. By characterizing hybrid channels containing wild-  
64 type (WT) and Yoda1-insensitive Piezo1 subunits, we further show that the binding of Yoda1 to  
65 a single subunit is sufficient for activation of the trimeric channel.

66

67

## 68 **Results**

### 69 **Molecular determinants for Yoda1 selectivity**

70 The purified Piezo1 channel reconstituted in artificial bilayer remains Yoda1-sensitive(26).  
71 Hence, the Piezo1 protein possesses an endogenous agonist Yoda1 binding site that enables  
72 channel activation. The strict Piezo1-selectivity exhibited by Yoda1 must then originate from  
73 amino acid differences between the Piezo1 and Piezo2 primary sequence. Since chimeras  
74 between evolutionary-distant Piezo homologs remain functional(27), we reasoned that chimeras  
75 between mouse Piezo1 (mPiezo1) and mouse Piezo2 (mPiezo2) will yield functioning proteins  
76 with altered Yoda1-sensitivity. Since Yoda1 stabilize the open pore conformation in absence of  
77 mechanical stimulation(26), we reasoned that the Yoda1 binding site is likely located near the  
78 pore in the C-terminal region. We thus designed three C-terminal chimeras and named them by  
79 the residue number after which the C-terminal sequence is from mPiezo2 (i.e. Ch1961, Ch2063  
80 and Ch2456, Fig 1c and Supplementary Fig 1). The C-terminal chimeras were expressed into  
81 HEK293T cells and characterized using a fluorescence assay based on the calcium-sensitive  
82 organic dye Fluo8-AM (Fig 1d). A variant of this assay was previously used to characterize  
83 Yoda1 sensitivity of Piezo homologs and disease variants(26). The chimeras Ch2063 and 2456  
84 exhibit concentration-dependent fluorescence responses similar to WT mPiezo1 (Fig 1e). In  
85 contrast, Ch1961 was totally insensitive to Yoda1 in the range of concentrations tested, similar to  
86 the Yoda1-insensitive mPiezo2. We independently confirmed the ability of the three C-terminal  
87 chimeras to respond to mechanical stimulation induced by an acute hypotonic shock, a simple  
88 way to experimentally activate Piezo channels. All chimeras displayed robust responses similar  
89 to mPiezo1. These responses were significantly larger than the response obtained from cells  
90 transfected with a control vector (Fig 1f).

91

## 92 **A minimal region for Yoda1 binding**

93 To verify that the region 1961-2063 contains the molecular determinants for Yoda1 binding, we  
94 created the internal chimera Ch1961-2063. We next divided this region into three sub-regions  
95 (region 1: 1961-2004, region 2: 2005-2034 and region 3: 2035-2063) and engineered every  
96 possible combination of “sub-chimeras” replacing one or two sub-regions by the corresponding  
97 sequence from the mPiezo2 homolog (Fig 2a and Supplementary Fig 1).

98 For simplicity, these sub-chimeras were named by the number of the sub-region(s) being  
99 replaced (e.g. Ch1+3 in Fig 2a replaces the sub-regions 1961-2004 and 2035-2063 by their  
100 homolog sequences from mPiezo2). To reduce fluorescence background, calcium-sensitive  
101 fluorescence was measured by co-transcriptionally expressing the genetically-encoded  
102 fluorescent indicator GCaMP6m (see Methods). Wide-field fluorescence live-cell imaging  
103 showing GCaMP6m time course upon Yoda1 application in the presence or absence of mPiezo1  
104 can be seen in Video1 and Video2, respectively. The fluorescence of GCaMP6m does not change  
105 upon Yoda1 application in absence of mPiezo1, as when using Fluo8-AM (Fig 1d). All tested  
106 sub-chimeras displayed diminished fluorescence responses compared to mPiezo1 (Fig 2b). Yet,  
107 none of them completely suppressed the fluorescence response as seen in cells transfected with  
108 mPiezo2 or with the internal chimera 1961-2063. The internal chimera 1961-2063 remains able  
109 to elicit robust fluorescence responses upon acute hypotonic shock (Fig 2c) and to produce  
110 mechano-dependent ionic currents with amplitude similar to wild type mPiezo1 (Fig 2d). This  
111 shows that the elimination of the fluorescence signal in cells transfected with Ch1961-2063  
112 originates from the loss of the agonist binding site rather than a loss of channel function. We next

113 fitted the plots of the normalized peak currents  $I/I_{\max}$  against the pulse pressure  $P$  (Fig 2e) with a  
114 standard two-state Boltzmann equation:

$$\frac{I}{I_{\max}} = \frac{1}{1 + e^{-k(P-P_0)}}$$

115 with  $P_0$  the pressure corresponding to  $I = I_{\max}/2$  and  $k$  a constant representing the intrinsic  
116 electromechanical coupling of the channel. The fits yielded  $P_0 = 32.29 \pm 0.93$  mmHg for WT  
117 mPiezo1, consistent with previous studies(26). However, the chimera Ch1961-2063 exhibits an  
118 increased threshold for mechanosensitivity with a fitted  $P_0$  value of  $56.43 \pm 0.76$  mmHg (see  
119 Supplementary Table 1).

120

### 121 **Minimal Yoda1-sensitive subunit stoichiometry for Yoda1-mediated activation**

122 The presence of the entire mPiezo1 1961-2063 region appears necessary for chemical activation  
123 with Yoda1. Interestingly, this region is strategically located at the interface between the pore  
124 and the blade in each subunit (Fig 1a and Fig 2f). Since this region exists in each of the three  
125 Piezo1 subunits, Yoda1 could potentially bind to each subunit. How many subunits need to  
126 interact with the Yoda1 agonist to open the channel's pore?

127 In our assay, the measured fluorescence  $F$  is a function of the saturation function  $v$  of the  
128 protein  $P$  by the ligand  $L$  and of the background fluorescence  $q$ :

$$\mathbf{F} = \mathbf{q} + \mathbf{b}_{\max} \times \mathbf{v} \quad (1)$$

129 At  $t = 0$  s,  $[\text{Yoda1}] = 0$   $\mu\text{M}$ , then  $v = 0$ :

$$\frac{\mathbf{F} - \mathbf{F}_0}{\mathbf{F}_0} = \frac{(\mathbf{q} + \mathbf{b}_{\max} \times \mathbf{v}) - \mathbf{q}}{\mathbf{q}} = \frac{\mathbf{b}_{\max}}{\mathbf{q}} \times \mathbf{v} = \mathbf{B}_{\max} \mathbf{v} \quad (2)$$

130 In case of multiple binding sites per protein, the saturation function equals the total  
131 concentrations of bound ligands ( $[\text{L}]_{\text{bound}}$ ) over the total concentration of protein ( $[\text{P}]_0$ ):

$$v = \frac{[L]_{\text{bound}}}{[P]_0} \quad (3)$$

132 Assuming the existence of three identical and independent Yoda1 binding sites:

$$\frac{[L]_{\text{bound}}}{[P]_0} = \frac{[PL] + 2[PL] + 3[PL]}{[P] + [PL] + [PL] + [PL]} \quad (4)$$

133 The different protein species are related by the corresponding macroscopic dissociation constant

134  $K_1$ ,  $K_2$  and  $K_3$  corresponding to each binding step:

$$K_1 = \frac{[P][L]}{[PL]} ; K_2 = \frac{[PL][L]}{[PL_2]} ; K_3 = \frac{[PL_2][L]}{[PL_3]}$$

135 By replacing the macroscopic constants:

$$v = \frac{\frac{[L]}{K_1} + \frac{2[L]}{K_1 K_2} + \frac{3[L]}{K_1 K_2 K_3}}{1 + \frac{[L]}{K_1} + \frac{[L]}{K_1 K_2} + \frac{[L]}{K_1 K_2 K_3}} \quad (5)$$

136 The macroscopic constants are related to the microscopic dissociation constant  $K_d$  by the number

137 or possible binding combinations  $\Omega_{n,i}$  for each binding step  $i$  and for  $n$  binding sites:

$$K_i = \frac{\Omega_{n,i-1}}{\Omega_{n,i}} \times K_d = \frac{\binom{n}{i-1}}{\binom{n}{i}} = \frac{i}{n-i+1} \times K_d$$

138 Replacing the macroscopic constants by the  $K_d$  gives:

$$v = \frac{\frac{3[L]}{K_d} + \frac{6[L]^2}{K_d^2} + \frac{3[L]^3}{K_d^3}}{1 + \frac{3[L]}{K_d} + \frac{3[L]^2}{K_d^2} + \frac{[L]^3}{K_d^3}} \quad (6)$$

139 Equation (6) further simplifies by applying a binomial reduction:

$$v = \frac{n[L]}{K_d + [L]} \quad (7)$$



140 The details about this reduction can be found elsewhere(28). Assuming the binding of one or  
141 more ligand per channel produces similar channel opening, every bound species in the numerator  
142 of equation (6) contribute proportionally to the observed fluorescence signal:

$$\frac{F - F_0}{F_0} = B_{\max} \times \frac{n[L]}{K_d + [L]} \quad (8)$$

143 However, if the binding of two or three ligands is required for channel activation, the fraction of  
144 channel with a single ligand does not contribute to the signal. In this case, the fluorescence signal  
145 follows:

$$\frac{F - F_0}{F_0} = B_{\max} \times \frac{\frac{6[L]^2}{K_d^2} + \frac{3[L]^3}{K_d^3}}{1 + \frac{3[L]}{K_d} + \frac{3[L]^2}{K_d^2} + \frac{[L]^3}{K_d^3}} \quad (9)$$

146 Similarly, if the binding of three ligands is necessary for channel activation, the fluorescence  
147 signal follows:

$$\frac{F - F_0}{F_0} = B_{\max} \times \frac{\frac{3[L]^3}{K_d^3}}{1 + \frac{3[L]}{K_d} + \frac{3[L]^2}{K_d^2} + \frac{[L]^3}{K_d^3}} \quad (10)$$

148 We tested these three binding situations modeled by equations (8), (9) and (10) by performing a  
149 dose-response on WT mPiezo1 with more data points (Fig 3a). Curve fitting clearly shows that a  
150 model with 3 ligands per channel (equation (10)) or with more than 2 ligands (equation (9)) does  
151 not fit well the data (Fig 3a and Table 1). In contrast, a model where every bound species equally  
152 contribute to the signal (equation (8)) provides a better fit. This suggests the binding of Yoda1 to  
153 a single binding site in one subunit is sufficient for channel opening. As indicated previously, the  
154 reported Kd values obtained from curve fitting are not accurate estimates of the dissociation  
155 constant due to the poor aqueous solubility of Yoda1 above 20-30  $\mu$ M(26).

156 **Table 1: Fitting results for different binding stoichiometry**

| Number of ligand per trimeric channel | 1-3                | 2-3               | 3                 |
|---------------------------------------|--------------------|-------------------|-------------------|
| Model equation                        | (8)                | (9)               | (10)              |
| $B_{\max}$                            | $1.701 \pm 0.152$  | $1.155 \pm 0.097$ | $0.744 \pm 0.102$ |
| $K_d$ ( $\mu\text{M}$ )               | $11.990 \pm 1.941$ | $2.245 \pm 0.297$ | $1.110 \pm 0.103$ |
| $R^2$                                 | 0.964              | 0.812             | 0.825             |

157  
 158 To further investigate the minimal binding stoichiometry of Yoda1, we co-expressed WT  
 159 mPiezo1 subunits with Yoda1-insensitive Ch1961-2063 subunits by transfecting HEK293T cells  
 160 with different ratios of the corresponding plasmids. The subunit mixtures lead to four channel  
 161 species with a number of WT subunits ranging from 0 to 3 (Fig 3b). Assuming WT and chimeric  
 162 subunits are expressed in proportion to the amount of transfected plasmid and assuming hybrid  
 163 channels are formed by random association of WT and chimeric subunits, the fraction (Fr) of  
 164 assembled channels with  $i$  WT subunits for a trimeric channels is given by the equation:

$$\text{Fr}_{(i)} = \binom{3}{i} f_{\text{Ch}}^{(3-i)} f_{\text{WT}}^i \quad (11)$$

165 With  $f_{\text{Ch}}$  and  $f_{\text{WT}}$  the relative fractions of plasmids encoding chimeric and WT subunits,  
 166 respectively.

167 We transfected HEK293T cells with different plasmid mixtures containing 10%, 30%,  
 168 50% or 100% WT mPiezo1. The predicted fraction for each species and for each tested mixture  
 169 is indicated in Fig 3b. Surprisingly, cells transfected with a mixture containing only 10% WT  
 170 subunits produced robust fluorescence signals (Fig 3c). Indeed, at saturating Yoda  
 171 concentrations, this signal amounts to approximately a third of the fluorescence signal observed  
 172 in cells transfected with 100% WT plasmids. When mixing 10% WT subunit with 90% chimeric  
 173 subunit, the predicted fraction of channels containing three WT subunits is only 0.1%, while the  
 174 large majority of WT subunits exist in channels containing two chimeric subunits (Fig 3b). This

175 indicates that the presence of a single WT subunit is sufficient for chemical activation of the  
176 channel with Yoda1. This observation is consistent with the fitting results from Fig 3a.

177 Next, we further performed a global fit of the dose-responses obtained for different  
178 mixtures and for WT mPiezo1. Based on equations (8) and (11), the fluorescence signal from a  
179 heterogeneous population of channel species with  $i$  number of WT subunit(s) will be a function  
180 of the saturation fraction multiplied by the total relative fraction of channel species contributing  
181 to the signal (i.e. having one or more WT subunit):

$$\frac{F - F_0}{F_0} = B_{\max} \left( \frac{[L]}{[L] + K_d} \right) (Fr_{(i=3)} + Fr_{(i=2)} + Fr_{(i=1)})$$

182 Since  $\sum_{i=0}^3 Fr_{(i)} = 1$ , the equation can be simplified:

$$\frac{F - F_0}{F_0} = B_{\max} \left( \frac{[L]}{[L] + K_d} \right) (1 - Fr_{(i=0)}) \quad (12)$$

183 Where  $Fr_{(i=0)}$  correspond to the non-contributing fraction of channels containing three chimeric  
184 subunits. Equation (12) was used for a global fit of the data shown in Fig 3c. The fitting was  
185 done with only two shared fitted parameters,  $B_{\max}$  and  $K_d$ , while the fractions  $Fr_0$  were calculated  
186 for each tested plasmid mixture. The global fit produced an overall coefficient of determination  
187  $R^2$  of 0.907, a  $B_{\max}$  value of  $4.219 \pm 0.325$  and a  $K_d$  of  $9.624 \pm 1.412 \mu\text{M}$ . This fitted  $K_d$  value is  
188 similar to the  $K_d$  value obtained by fitting the WT dose-response with the binding model  
189 corresponding to equation (8) ( $11.990 \pm 1.941 \mu\text{M}$ , see Fig 3 and Table 1). Differences in the  
190 fitted  $B_{\max}$  can be due to fluctuations in background fluorescence  $q$  between experiments as  
191 indicated by equations (1) and (2).

192 Another way of confirming that each channel containing at least one WT subunit is able  
193 to open in response to Yoda1 binding is to compare the observed vs. predicted contributing  
194 fractions of Yoda1-sensitive hybrid channels. From equation (12) we can see that:

$$\frac{\frac{\Delta F}{F_0}(\text{mix})}{\frac{\Delta F}{F_0}(\text{WT})} = (1 - Fr_{0(\text{mix})}) \quad (13)$$

195 With  $\Delta F/F_{0(\text{mix})}$  the fluorescence signal observed when mixing WT and chimeric subunits,  
196  $\Delta F/F_{0(\text{WT})}$  the fluorescence signal observed for WT channels and  $1-Fr_{0(\text{mix})}$  the observed  
197 contributing fraction of channels obtained when mixing subunits in a given ratio. We determined  
198 the observed contributing fraction ( $1-Fr_{0(\text{mix})}$ ) by calculating the term on the left of equation (13)  
199 for each Ch:WT ratio. This number was averaged from six Yoda1 concentrations ranging  
200 between 2  $\mu\text{M}$  and 75  $\mu\text{M}$ . The observed contributing fractions were then plotted against the  
201 predicted contributing fractions of hybrid channels containing more than one ( $1 \leq i \leq 3$ ), more  
202 than 2 ( $2 \leq i \leq 3$ ) or 3 WT subunits ( $i = 3$ ) using equation (11). The plots shows that the observed  
203 fractions nearly perfectly match the predicted fractions only if hybrid channels containing one or  
204 more WT subunits contribute to the fluorescence signal (Fig 3d, dotted magenta line).

205

206

## 207 **Discussion**

208 In this study, we created chimeras between Piezo1 and Piezo2 to identify the minimal region  
209 required for the selective binding of the agonist Yoda1. In principle, the Yoda1 binding site on  
210 Piezo1 could be directly identified by solving the structure of the agonist-channel complex.  
211 However, the current resolution of the mPiezo1 structure (4.8Å) is too low to resolve most side  
212 chains in the protein. This would preclude the localization of the 21-atom Yoda1 molecule. On  
213 the other hand, the agonist binding site could be identified in functioning Piezo1 channels using a  
214 spectroscopic nanopositioning approach(29). However, such spectroscopic measurements would  
215 require fluorescent versions of Yoda1 which retain the same pharmacological properties.

216 Our data show that the strict selectivity of Yoda1 towards mPiezo1 originates from a  
217 minimal protein region spanning residues 1961 to 2063. This region contains 17 residues that are  
218 not conserved between the two mammalian Piezo isoforms and that are dispersed into three  
219 clusters (Supplementary Fig 1). The mPiezo1 channel becomes fully insensitive to Yoda1 only  
220 when all three clusters are exchanged with their counterpart from the mPiezo2 primary sequence.  
221 Any chimeric combination made by exchanging two out of three clusters yielded chimeras with  
222 some degree of Yoda1 sensitivity (Fig 2b). Thus, some, if not all, residues from each cluster are  
223 required to form the Yoda1 binding site. We do not know yet whether Yoda1 directly interacts  
224 with these residues or whether some of these residues are required to form a binding site in a  
225 nearby region. Hence, we envisage two hypotheses to explain the origin of Yoda1 isoform-  
226 selectivity. First, Yoda1 may directly interact with Piezo1-specific residues. In this case, Yoda1  
227 must directly interact with some of the identified residues in each cluster in the region 1961-  
228 2063. Second, Yoda1 may directly interact with residues that are conserved in Piezo1 and Piezo2  
229 but whose conformation depends on the presence of non-conserved residues in each cluster in the  
230 1961-2063 region. In this case the selectivity of Yoda1 must originate from a difference in the

231 conformation of the binding site rather than from a difference in the chemical composition of its  
232 residues. Future studies will be needed to distinguish between these two possibilities.

233         Activation of the Yoda1-insensitive Ch1961-2063 chimera by negative pressure in a cell-  
234 attached patch requires higher pressures than WT mPiezo1 channels (Fig 2e). Incidentally, the  
235 threshold for mechanical activation of mPiezo2 channels is also higher than for mPiezo1(26).  
236 Hence, the region identified here as necessary for agonist binding appears as an important region  
237 to regulate the mechanical sensitivity of Piezo channels.

238         The predicted fractions of hybrid channels obtained by mixing WT and mutant subunits  
239 are true if only two assumptions are satisfied. The first is that the cellular expression of both  
240 subunits is proportional to the quantity of transfected plasmid. This seems to be the case  
241 according to the similar level of ionic current measured in cells transfected with the individual  
242 plasmids (Fig 2d). The other assumption is that both subunits randomly assemble to form  
243 trimeric channels. We do not know if this is the case. Protein-protein interaction experiments  
244 such as resonance energy transfer between fluorescent probes covalently linked to WT and  
245 chimeric subunits would confirm the existence of hybrid channels. However, the absolute  
246 quantification of the species in a heterogenous population of hybrid channels would be  
247 technically challenging to assess.

248         The fact that a single WT subunit suffices to confer Yoda1 sensitivity to the trimeric  
249 channel has profound mechanistic consequences regarding the gating process of the channel.  
250 Homo-multimeric ion channels with a central permeation pathway often undergo symmetrical  
251 concerted conformational rearrangements in all subunits to control the opening/closure of their  
252 pore. Hence, binding of Yoda1 to one subunit may induce a concerted transition in all subunits in  
253 the pore region that stabilizes the channel's open state. On the other hand, Yoda1 binding in a

254 single subunit could induce partial opening of the pore. In this case, incremental binding of the  
255 ligand in each subunit would yield distinct open states with incremental sub-conductance levels.  
256 These hypotheses could be tested by recording single channel currents from concatenated Piezo  
257 channels made by fusing a known number of WT and chimeric subunits in the same open  
258 reading frame. However, the large size of a single mammalian Piezo subunit (2400-2600 amino  
259 acids) would make those experiments challenging.

260

261 In summary, we have identified the minimal binding region of the only known isoform selective  
262 modulator of the mechanosensitive Piezo ion channel family. We further show that the binding  
263 of the agonist to only one subunit enables ligand-induced activation of the trimeric channel. This  
264 study shed lights on the gating mechanisms of Piezo proteins and will pave the way for the  
265 rationale design of small molecules with relevant pharmacological properties.

266

## 267 **Materials and Methods**

268 *Molecular Cloning:* A pCDNA3 plasmid containing mPiezo1 was obtained from Dr. Mikhail  
269 Shapiro (Caltech) and was originally a gift from Dr. Patapoutian (The Scripps Research  
270 Institute). A Sport6 plasmid encoding mPiezo2 was directly obtained from Dr. Pataouptian. To  
271 create the polycistronic vector pCDNA3-mPZ1-IRES-GCaMP6m, we PCR-amplified the  
272 pCDNA-mPZ1 plasmid, the internal ribosome entry site (IRES) cassette from a pIRES-eGFP  
273 plasmid and the GCaMP6m cDNA from a pGP-CMV-GCaMP6m plasmid (Addgene plasmid  
274 #40754) and assembled them using the NEBuilder HiFi DNA Assembly kit (New England  
275 Biolabs). A similar procedure was used to create pCDNA3-mPZ2-IRES-GCaMP6m, pCDNA3-  
276 GCaMP6m and the empty control vector pCDNA3. All mPZ1-mPZ2 chimeras with or without  
277 the IRES-GCaMP6m cassette were created using the same approach. All constructs were verified  
278 by automated Sanger sequencing (Genewiz).

279  
280 *Cell culture and transfection:* HEK293T cells (a gift from Dr. Mikhail Shapiro and originally  
281 purchased directly from ATCC) were cultured in standard conditions (37°C, 5% CO<sub>2</sub>) in a  
282 DMEM medium supplemented with Penicillin (100 U/mL), streptomycin (0.1 mg/mL), 10%  
283 sterile Fetal Bovine Serum and 1X MEM non-essential amino-acid without L-glutamine. All cell  
284 culture products were purchased from Sigma-Aldrich. Transfection was done on cells with a  
285 passage number lower than 25 using polyethylenimine (PEI, Polysciences #23966). Briefly, a  
286 sterile mixture of DNA:PEI (1:4 w/w) was prepared using sterile 100mM NaCl solution and  
287 added directly to the cell's culture medium (220ng of total DNA was added per cm<sup>2</sup> of cultured  
288 surface). Culture medium was changed 16-20 hours after transfection. For fluorescence  
289 experiments, cells seeded on clear-bottom black 96-well plates (Nunc) were transfected at ~50%



290 confluence 2-4 days before the experiment. For electrophysiology experiments, cells seeded on  
291 uncoated coverslips were transfected at ~10% confluence 1 day prior recordings.

292

293 *Calcium imaging, osmotic shocks and chemical treatment:* Fluo-8 AM was purchased from  
294 abcam (ab142773), dissolved in dimethyl sulfoxide (DMSO) and stored in 5mM aliquots at -  
295 20°C. Yoda1 was purchased from Sigma-Aldrich (#SML1558), dissolved in DMSO and stored  
296 in 10mM aliquots at -20°C. For experiments with Fluo8-AM, cells were washed with a normal  
297 physiological solution (NPSS) containing 140mM NaCl, 5mM KCl, 2mM MgCl<sub>2</sub>, 1mM CaCl<sub>2</sub>,  
298 10mM HEPES (pH 7.4 with HCl or NaOH) and 10mM Glucose and incubated for 1 hour in a  
299 37°C/5% CO<sub>2</sub> incubator with a NPSS solution containing 3-5 µM Fluo-8 AM. After incubation,  
300 cells were washed again with 100µL NPSS and placed on a Nikon inverted fluorescence  
301 microscope. Epifluorescence excitation was provided by a 100W mercury lamp through a 20X  
302 objective and fluorescence images were obtained using a standard GFP filter set and acquired at  
303 1 frame/sec using a Nikon Digital Sight camera and the Nikon Digital Element D software.  
304 During recordings, 100µL of a 2X Yoda1 NPSS solution was added to the cells at t = 30 s or  
305 sometimes at t = 10 s. Total DMSO concentration was kept below 1% for all tested Yoda  
306 concentrations. For osmotic shocks, 200µL of a hypotonic solution was added to the 100µL  
307 isotonic NPSS during the recording. Hypotonic solution was similar to NPSS except the NaCl  
308 concentration was reduced from 140mM to 5mM. For experiments with GCaMP6m,  
309 fluorescence imaging was done similarly except the 1 hour Fluo-8 AM treatment was replaced  
310 by a 1 hour NPSS incubation. Fluorescence images were analyzed with ImageJ.

311

312 *Cell-attached patch-clamp recordings:* During recordings, the membrane potential was zeroed  
313 using a depolarizing bath solution containing 140 mM KCl, 1mM MgCl<sub>2</sub>, 10 mM glucose and 10  
314 mM HEPES pH 7.3 (with KOH). Fire-polished patch pipettes with a diameter of 1-5 μm and  
315 resistance of 1-5 MΩ were filled with a recording solution containing 130 mM NaCl, 5 mM KCl,  
316 1 mM CaCl<sub>2</sub>, 1 mM MgCl<sub>2</sub>, 10 mM TEA-Cl and 10 mM HEPES pH 7.3 (with NaOH). Stretch-  
317 activated currents were recorded in the cell-attached configuration after seal formation using a  
318 Multiclamp 700B amplifier (Axon) and a high-speed pressure clamp (HSPC-1, ALA Scientific  
319 Instruments). The membrane potential inside the patch was held at -80mV. Data were recorded at  
320 a sampling frequency of 10 kHz and filtered offline at 2 kHz using pClamp (Axon). Although the  
321 data shown are unaltered traces, peak current amplitudes were determined by adjusting the  
322 baseline at the end of the pressure pulse. No mechanosensitive ionic currents could be detected in  
323 these conditions in untransfected HEK293T cells (n = 25, data not shown).

324  
325 *Statistics:* For imaging, each experiment was done in duplicate and repeated n times (n values are  
326 indicated in the figures). For each experiment, the fluorescence intensity taken from 30 cells (15  
327 cells per image stack in duplicate) was averaged. Cells were selected randomly for analysis at the  
328 beginning of the movie before Yoda1 application. Dead cells with abnormal shape or unusual  
329 high fluorescence (i.e. high cytosolic [Ca<sup>2+</sup>]) were excluded from analyses. The final F<sub>(t=1min)</sub>-  
330 F<sub>0</sub>/F<sub>0</sub> values and standard errors were calculated by averaging the mean values from n  
331 experiment. For electrophysiology, the relative peak current values and standard error (Fig 2e)  
332 are from averaging one series of recordings from n transfected cells. To test statistical difference  
333 between two mean values, we performed 2-tails unpaired Student's t tests. The exact t-values and

334 standard p-value ranges are indicated in each figure. The degree of freedom equals  $n-1$ . All  
335 fitting were done using OriginPro 2017.  
336

337 **Acknowledgment**

338 We thank Dr. Xiaoning Bi for lending us an inverted fluorescence microscope, Dr. Mikhail  
339 Shapiro from lending us a Multiclamp 700B amplifier and Dr. Ardem Patapoutian for the gift of  
340 the mPiezo cDNAs. We also thank David Kent, John T. Fly and Brennan Kidder for their  
341 technical help with molecular biology.

342

343

344

345

346

## 347 **References**

- 348 1. Coste B, Mathur J, Schmidt M, Earley T J, Ranade S, Petrus M J, Dubin A E, Patapoutian  
349 A. 2010. Piezo1 and Piezo2 are essential components of distinct mechanically activated  
350 cation channels. *Science* 330;55-60. doi: 10.1126/science.1193270.
- 351 2. Coste B, Xiao B, Santos J S, Syeda R, Grandl J, Spencer K S, Kim S E, Schmidt M,  
352 Mathur J, Dubin A E, Montal M, Patapoutian A. 2012. Piezo proteins are pore-forming  
353 subunits of mechanically activated channels. *Nature* 483;176-181. doi:  
354 10.1038/nature10812.
- 355 3. Ranade S S, Woo S H, Dubin A E, Moshourab R A, Wetzel C, Petrus M, Mathur J,  
356 Begay V, Coste B, Mainquist J, Wilson A J, Francisco A G, Reddy K, Qiu Z, Wood J N,  
357 Lewin G R, Patapoutian A. 2014. Piezo2 is the major transducer of mechanical forces for  
358 touch sensation in mice. *Nature* 516;121-125. doi: 10.1038/nature13980.
- 359 4. Woo S H, Lukacs V, de Nooij J C, Zaytseva D, Criddle C R, Francisco A, Jessell T M,  
360 Wilkinson K A, Patapoutian A. 2015. Piezo2 is the principal mechanotransduction  
361 channel for proprioception. *Nature neuroscience* 18;1756-1762. doi: 10.1038/nn.4162.
- 362 5. Wu Z, Grillet N, Zhao B, Cunningham C, Harkins-Perry S, Coste B, Ranade S, Zebajadi  
363 N, Beurg M, Fettiplace R, Patapoutian A, Muller U. 2016. Mechanosensory hair cells  
364 express two molecularly distinct mechanotransduction channels. *Nature neuroscience*  
365 doi: 10.1038/nn.4449.
- 366 6. Ranade S S, Qiu Z, Woo S H, Hur S S, Murthy S E, Cahalan S M, Xu J, Mathur J,  
367 Bandell M, Coste B, Li Y S, Chien S, Patapoutian A. 2014. Piezo1, a mechanically  
368 activated ion channel, is required for vascular development in mice. *Proceedings of the*  
369 *National Academy of Sciences of the United States of America* 111;10347-10352. doi:  
370 10.1073/pnas.1409233111.
- 371 7. Li J, Hou B, Tumova S, Muraki K, Bruns A, Ludlow M J, Sedo A, Hyman A J,  
372 McKeown L, Young R S, Yuldasheva N Y, Majeed Y, Wilson L A, Rode B, Bailey M A,  
373 Kim H R, Fu Z, Carter D A, Bilton J, Imrie H et al. 2014. Piezo1 integration of vascular  
374 architecture with physiological force. *Nature* 515;279-282. doi: 10.1038/nature13701.
- 375 8. Pathak M M, Nourse J L, Tran T, Hwe J, Arulmoli J, Le D T, Bernardis E, Flanagan L A,  
376 Tombola F. 2014. Stretch-activated ion channel Piezo1 directs lineage choice in human  
377 neural stem cells. *Proceedings of the National Academy of Sciences of the United States*  
378 *of America* 111;16148-16153. doi: 10.1073/pnas.1409802111.
- 379 9. Wang S, Chennupati R, Kaur H, Iring A, Wettschureck N, Offermanns S. 2016.  
380 Endothelial cation channel PIEZO1 controls blood pressure by mediating flow-induced  
381 ATP release. *The Journal of clinical investigation* 126;4527-4536. doi:  
382 10.1172/JCI87343.
- 383 10. Cahalan S M, Lukacs V, Ranade S S, Chien S, Bandell M, Patapoutian A. 2015. Piezo1  
384 links mechanical forces to red blood cell volume. *eLife* 4doi: 10.7554/eLife.07370.
- 385 11. Eisenhoffer G T, Loftus P D, Yoshigi M, Otsuna H, Chien C B, Morcos P A, Rosenblatt  
386 J. 2012. Crowding induces live cell extrusion to maintain homeostatic cell numbers in  
387 epithelia. *Nature* 484;546-549. doi: 10.1038/nature10999.
- 388 12. Gudipaty S A, Lindblom J, Loftus P D, Redd M J, Edes K, Davey C F, Krishnegowda V,  
389 Rosenblatt J. 2017. Mechanical stretch triggers rapid epithelial cell division through  
390 Piezo1. *Nature* 543;118-121. doi: 10.1038/nature21407.

- 391 13. Demolombe S, Duprat F, Honore E, Patel A. 2013. Slower Piezo1 inactivation in  
392 dehydrated hereditary stomatocytosis (xerocytosis). *Biophysical journal* 105;833-834.  
393 doi: 10.1016/j.bpj.2013.07.018.
- 394 14. Andolfo I, Alper S L, De Franceschi L, Auriemma C, Russo R, De Falco L, Vallefuoco  
395 F, Esposito M R, Vandorpe D H, Shmukler B E, Narayan R, Montanaro D, D'Armiento  
396 M, Vetro A, Limongelli I, Zuffardi O, Glader B E, Schrier S L, Brugnara C, Stewart G W  
397 et al. 2013. Multiple clinical forms of dehydrated hereditary stomatocytosis arise from  
398 mutations in PIEZO1. *Blood* 121;3925-3935, S3921-3912. doi: 10.1182/blood-2013-02-  
399 482489.
- 400 15. Andolfo I, Russo R, Manna F, Shmukler B E, Gambale A, Vitiello G, De Rosa G,  
401 Brugnara C, Alper S L, Snyder L M, Iolascon A. 2015. Novel Gardos channel mutations  
402 linked to dehydrated hereditary stomatocytosis (xerocytosis). *American journal of*  
403 *hematology* 90;921-926. doi: 10.1002/ajh.24117.
- 404 16. Coste B, Houge G, Murray M F, Stitzel N, Bandell M, Giovanni M A, Philippakis A,  
405 Hoischen A, Riemer G, Steen U, Steen V M, Mathur J, Cox J, Lebo M, Rehm H, Weiss S  
406 T, Wood J N, Maas R L, Sunyaev S R, Patapoutian A. 2013. Gain-of-function mutations  
407 in the mechanically activated ion channel PIEZO2 cause a subtype of Distal  
408 Arthrogyriposis. *Proceedings of the National Academy of Sciences of the United States of*  
409 *America* 110;4667-4672. doi: 10.1073/pnas.1221400110.
- 410 17. McMillin M J, Beck A E, Chong J X, Shively K M, Buckingham K J, Gildersleeve H I,  
411 Aracena M I, Aylsworth A S, Bitoun P, Carey J C, Clericuzio C L, Crow Y J, Curry C J,  
412 Devriendt K, Everman D B, Fryer A, Gibson K, Giovannucci Uzielli M L, Graham J M,  
413 Jr., Hall J G et al. 2014. Mutations in PIEZO2 cause Gordon syndrome, Marden-Walker  
414 syndrome, and distal arthrogyriposis type 5. *American journal of human genetics* 94;734-  
415 744. doi: 10.1016/j.ajhg.2014.03.015.
- 416 18. Okubo M, Fujita A, Saito Y, Komaki H, Ishiyama A, Takeshita E, Kojima E, Koichihara  
417 R, Saito T, Nakagawa E, Sugai K, Yamazaki H, Kusaka K, Tanaka H, Miyake N,  
418 Matsumoto N, Sasaki M. 2015. A family of distal arthrogyriposis type 5 due to a novel  
419 PIEZO2 mutation. *American journal of medical genetics. Part A* 167A;1100-1106. doi:  
420 10.1002/ajmg.a.36881.
- 421 19. Alisch F, Weichert A, Kalache K, Paradiso V, Longardt A C, Dame C, Hoffmann K,  
422 Horn D. 2016. Familial Gordon syndrome associated with a PIEZO2 mutation. *American*  
423 *journal of medical genetics. Part A* doi: 10.1002/ajmg.a.37997.
- 424 20. Mahmud A A, Nahid N A, Nassif C, Sayeed M S, Ahmed M U, Parveen M, Khalil M I,  
425 Islam M M, Nahar Z, Rypens F, Hamdan F F, Rouleau G A, Hasnat A, Michaud J L.  
426 2016. Loss of the proprioception and touch sensation channel PIEZO2 in siblings with a  
427 progressive form of contractures. *Clinical genetics* doi: 10.1111/cge.12850.
- 428 21. Delle Vedove A, Storbeck M, Heller R, Holker I, Hebbar M, Shukla A, Magnusson O,  
429 Cirak S, Girisha K M, O'Driscoll M, Loeys B, Wirth B. 2016. Biallelic Loss of  
430 Proprioception-Related PIEZO2 Causes Muscular Atrophy with Perinatal Respiratory  
431 Distress, Arthrogyriposis, and Scoliosis. *American journal of human genetics* 99;1206-  
432 1216. doi: 10.1016/j.ajhg.2016.09.019.
- 433 22. Haliloglu G, Becker K, Temucin C, Talim B, Kucuksahin N, Pergande M, Motameny S,  
434 Nurnberg P, Aydingoz U, Topaloglu H, Cirak S. 2017. Recessive PIEZO2 stop mutation  
435 causes distal arthrogyriposis with distal muscle weakness, scoliosis and proprioception  
436 defects. *Journal of human genetics* 62;497-501. doi: 10.1038/jhg.2016.153.

- 437 23. Fotiou E, Martin-Almedina S, Simpson M A, Lin S, Gordon K, Brice G, Atton G, Jeffery  
438 I, Rees D C, Mignot C, Vogt J, Homfray T, Snyder M P, Rockson S G, Jeffery S,  
439 Mortimer P S, Mansour S, Ostergaard P. 2015. Novel mutations in PIEZO1 cause an  
440 autosomal recessive generalized lymphatic dysplasia with non-immune hydrops fetalis.  
441 Nature communications 6;8085. doi: 10.1038/ncomms9085.
- 442 24. Nonomura K, Woo S H, Chang R B, Gillich A, Qiu Z, Francisco A G, Ranade S S,  
443 Liberles S D, Patapoutian A. 2017. Piezo2 senses airway stretch and mediates lung  
444 inflation-induced apnoea. Nature 541;176-181. doi: 10.1038/nature20793.
- 445 25. Bai T, Li Y, Xia J, Jiang Y, Zhang L, Wang H, Qian W, Song J, Hou X. 2017. Piezo2: A  
446 Candidate Biomarker for Visceral Hypersensitivity in Irritable Bowel Syndrome? Journal  
447 of neurogastroenterology and motility doi: 10.5056/jnm16114.
- 448 26. Syeda R, Xu J, Dubin A E, Coste B, Mathur J, Huynh T, Matzen J, Lao J, Tully D C,  
449 Engels I H, Petrassi H M, Schumacher A M, Montal M, Bandell M, Patapoutian A. 2015.  
450 Chemical activation of the mechanotransduction channel Piezo1. eLife 4doi:  
451 10.7554/eLife.07369.
- 452 27. Coste B, Murthy S E, Mathur J, Schmidt M, Mechioukhi Y, Delmas P, Patapoutian A.  
453 2015. Piezo1 ion channel pore properties are dictated by C-terminal region. Nature  
454 communications 6;7223. doi: 10.1038/ncomms8223.
- 455 28. Klotz I M. 1985. Ligand--receptor interactions: facts and fantasies. Quarterly reviews of  
456 biophysics 18;227-259. doi.
- 457 29. Sandtner W, Egwolf B, Khalili-Araghi F, Sanchez-Rodriguez J E, Roux B, Bezanilla F,  
458 Holmgren M. 2011. Ouabain binding site in a functioning Na<sup>+</sup>/K<sup>+</sup> ATPase. The Journal  
459 of biological chemistry 286;38177-38183. doi: 10.1074/jbc.M111.267682.

460

461

462 **Figure Legends**

463 **Fig. 1 A chimeric approach to determine the Yoda1 binding site in mPiezo1. a** mPiezo1  
464 cryo-EM structure (PDBID:3JAC). The indicated structural features are highlighted with  
465 differential coloring. **b** Yoda1 chemical structure. **c** Generation of C-terminal chimeras with  
466 respect to their approximate position in the mPiezo1 topology (coloring is identical to a).  
467 Residue numbers are from mPiezo1; mPZ1=mPiezo1, mPZ1=mPiezo2. **d** Relative Ca<sup>2+</sup>-sensitive  
468 fluorescence time course from HEK293T cells transfected with WT mPZ1 (black and magenta  
469 traces) or the empty vector pCDNA3 (blue trace). Cells were pre-loaded with Fluo8-AM and  
470 incubated with 30μM Yoda1 (blue and black traces) or a control solution (magenta trace) at t =  
471 30 s. **e** Relative fluorescence changes from HEK293T cells expressing the indicated C-terminal  
472 chimeras (n = 4 for each plot), mPZ1 (magenta, n = 4) or mPZ2 (purple, n = 4) plotted against  
473 Yoda1 concentration at t = 60 s. **f** Relative fluorescence changes from HEK293T cells expressing  
474 the indicated construct (n = 5 for each plot) or the empty vector pCDNA3 (control, n = 5)  
475 following an acute hypotonic shock. For each construct, the fluorescence signal was compared to  
476 the control using a Student's t-test. The numbers of the left of the bars above the histograms  
477 indicate the t-values for each test. Asterisks indicate standard p-value range: \*: 0.01 < p < 0.05;  
478 \*\*: 0.001 < p < 0.01 and \*\*\*: p < 0.001. In all panels, error bars = s.e.m.

479  
480 **Fig. 2 A minimal mPiezo1 region responsible for Yoda1 binding. a** Generation of internal  
481 chimeras in the mPiezo1 1961-2063 region. Filled regions represent mPZ2 sequence; residue  
482 numbers are from mPiezo1. **b** Relative fluorescence changes from HEK293 cells expressing the  
483 indicated Chimeras (n = 4 for each plot), mPZ1 (magenta, n = 4) or mPZ2 (dark blue, n = 4)  
484 plotted against Yoda1 concentration. **c** Relative fluorescence changes from HEK293T cells



485 expressing mPZ1 (n = 6), mPZ2 (n = 5) the Ch1961-2063 chimera (n = 6) or the empty vector  
486 pCDNA3 (control, n = 6) following an acute hypotonic shock. For each construct, the  
487 fluorescence signal was compared to the control using a Student's t-test. The numbers of the left  
488 of the bars above the histograms indicate the t-values for each test. Asterisks indicate standard p-  
489 value range: \*:  $0.01 < p < 0.05$ ; \*\*:  $0.001 < p < 0.01$  and \*\*\*:  $p < 0.001$ . **d** Pressure-clamp  
490 electrophysiology recordings in the cell-attached configuration for mPZ1 (magenta traces) and  
491 the Ch1961-2063 chimera (blue traces). **e** Normalized peak current as a function of the pressure  
492 pulse for mPZ1 (magenta squares, n = 3) and Ch1961-2063 (blue circles, n = 3). The traces  
493 correspond to a fit using a classical two-state Boltzmann equation (see text). **f** Position of the  
494 1961-2063 sub-regions (1961-2004, yellow; 2005-2034, orange and 2035-2063, blue) relative to  
495 the mPiezo1 cryo-EM structure (left: top view, right: side view). In all panels, error bars = s.e.m.

496  
497 **Fig. 3 Minimal effective Yoda1 binding stoichiometry.** **a** Fitting of the mPiezo1 Yoda1 dose  
498 response (n = 4) with three binding models corresponding to equations (8), (9) and (10) (see text  
499 and Table 1 for fitted parameters). **b** Co-expression of WT mPiezo1 subunits (WT) with Yoda1-  
500 insensitive Ch1961-2063 chimera subunits (Ch) yields four distinct channel species with  
501 predicted relative fraction as a function of the relative amount of WT vs. Ch subunits. **c** Yoda1  
502 dose-responses obtained by mixing WT and Ch subunits with the indicated ratios (n= 4 for each  
503 plot). The traces are fit obtained with a global fit from equation (12). **d** Observed vs. predicted  
504 fraction of contributing hybrid channels having i WT subunit. Each point is the mean values for  
505 six concentrations ranging from 2 to 75  $\mu\text{M}$  for the three tested mixtures. The red line  
506 corresponds to the linear function  $y = x$ . In all panels, error bars = s.e.m.

507

508 **Video1: Wide-field live-cell fluorescence imaging showing Yoda1-mediated Piezo1**  
509 **activation.** HEK293T cells co-expressing GCaMP6m and mPiezo1 were exposed to 100  $\mu$ M  
510 Yoda1 at t = 10 sec. Individual images showing GCaMP6m fluorescence were acquired at 1  
511 frame/ sec and displayed in the movie at 5 frames/sec.

512

513 **Video2: Piezo1-dependent Yoda1-induced GCaMP6m fluorescence changes.** HEK293T cells  
514 expressing GCaMP6m only were exposed to 100  $\mu$ M Yoda1 at t = 10 sec. Individual images  
515 showing GCaMP6m fluorescence were acquired at 1 frame/ sec and displayed in the movie at 5  
516 frames/sec.

517

518 **Supplementary Figure 1: Sequence alignment (T-coffee) of the C-terminal region of mouse**  
519 **Piezo1 (mPZ1), Piezo2 (mPZ2) and human Piezo1 (hPZ1) and Piezo2 (hPZ2).** The residues  
520 numbers correspond to positions used to create the chimeras. Asterisks indicate residues within  
521 the 1961-2063 region that are not conserved between mPiezo1 and mPiezo2.

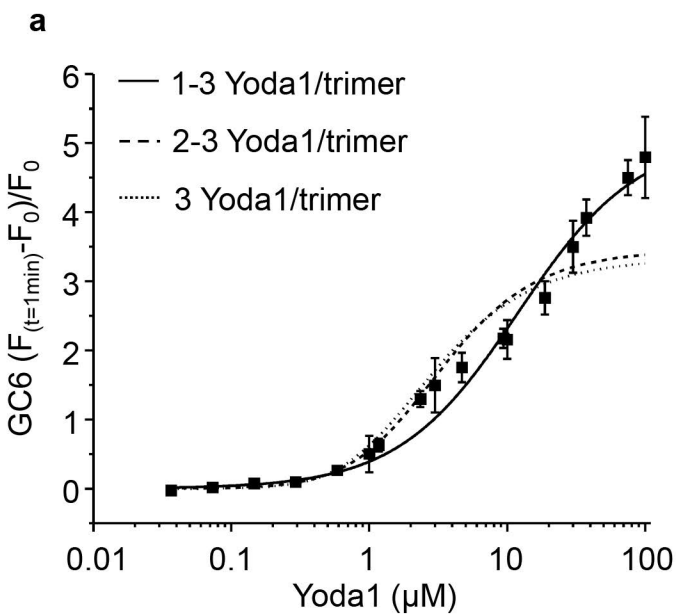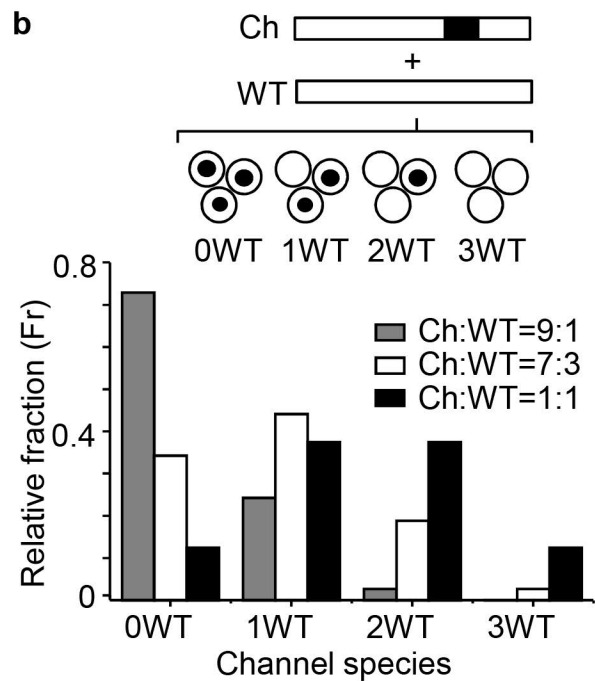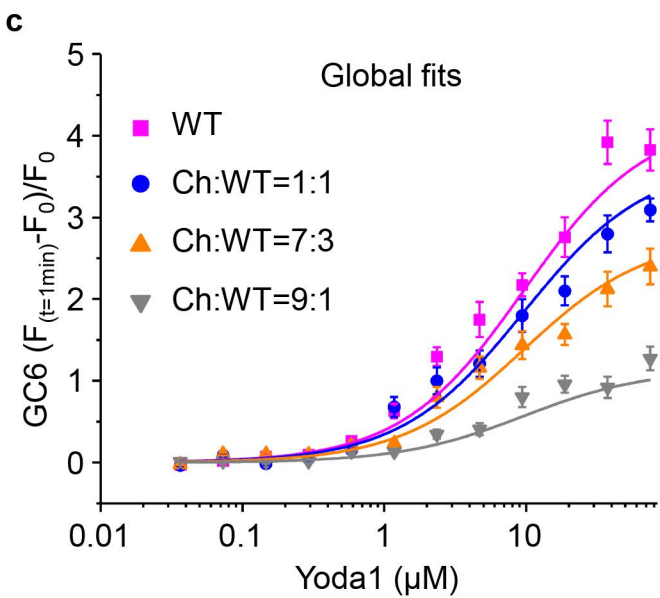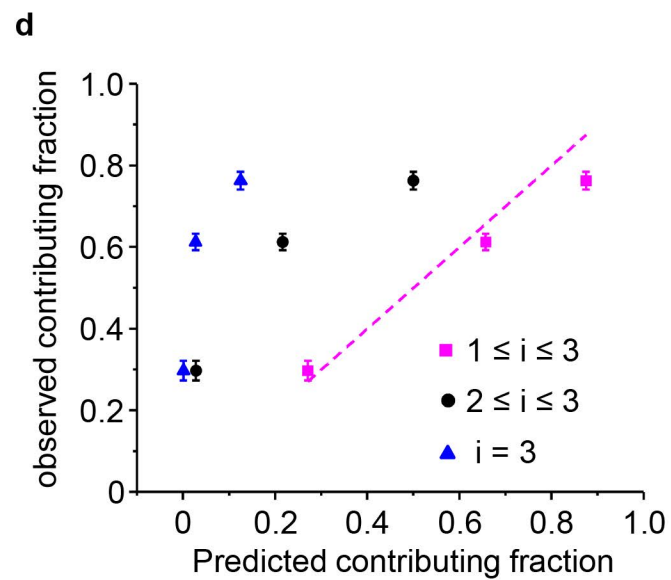

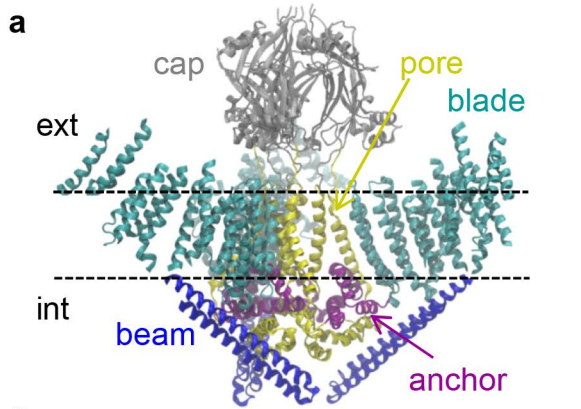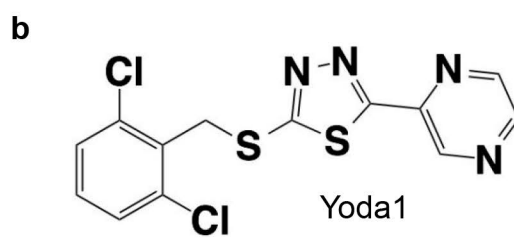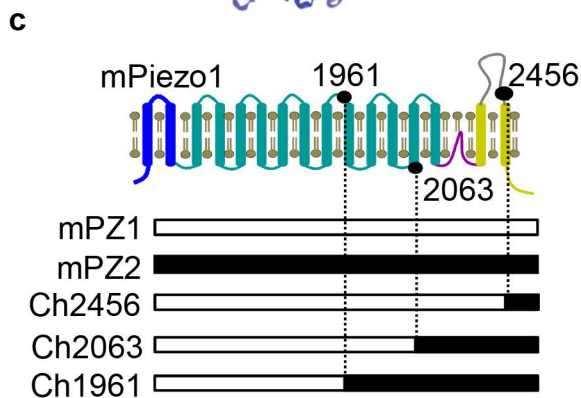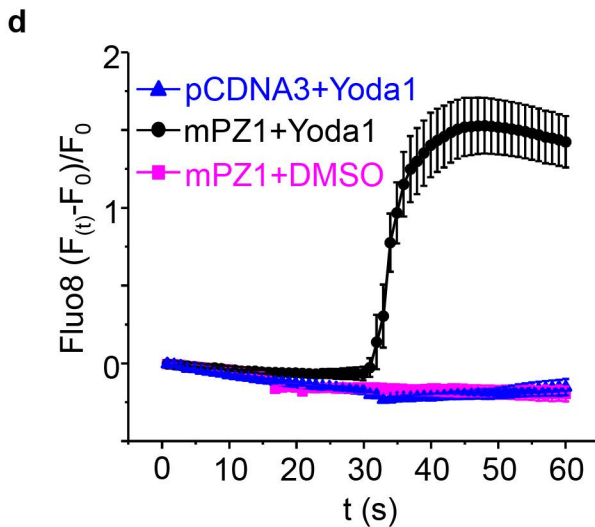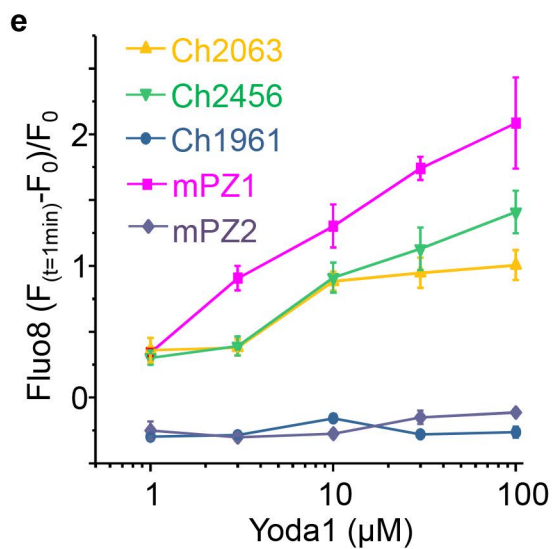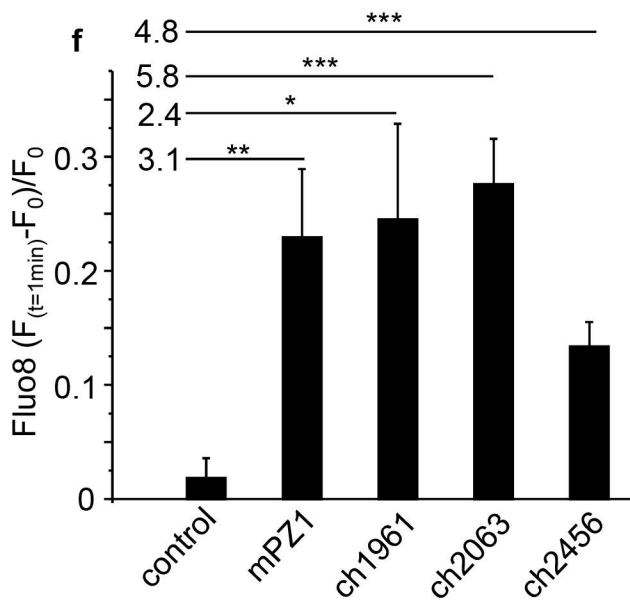

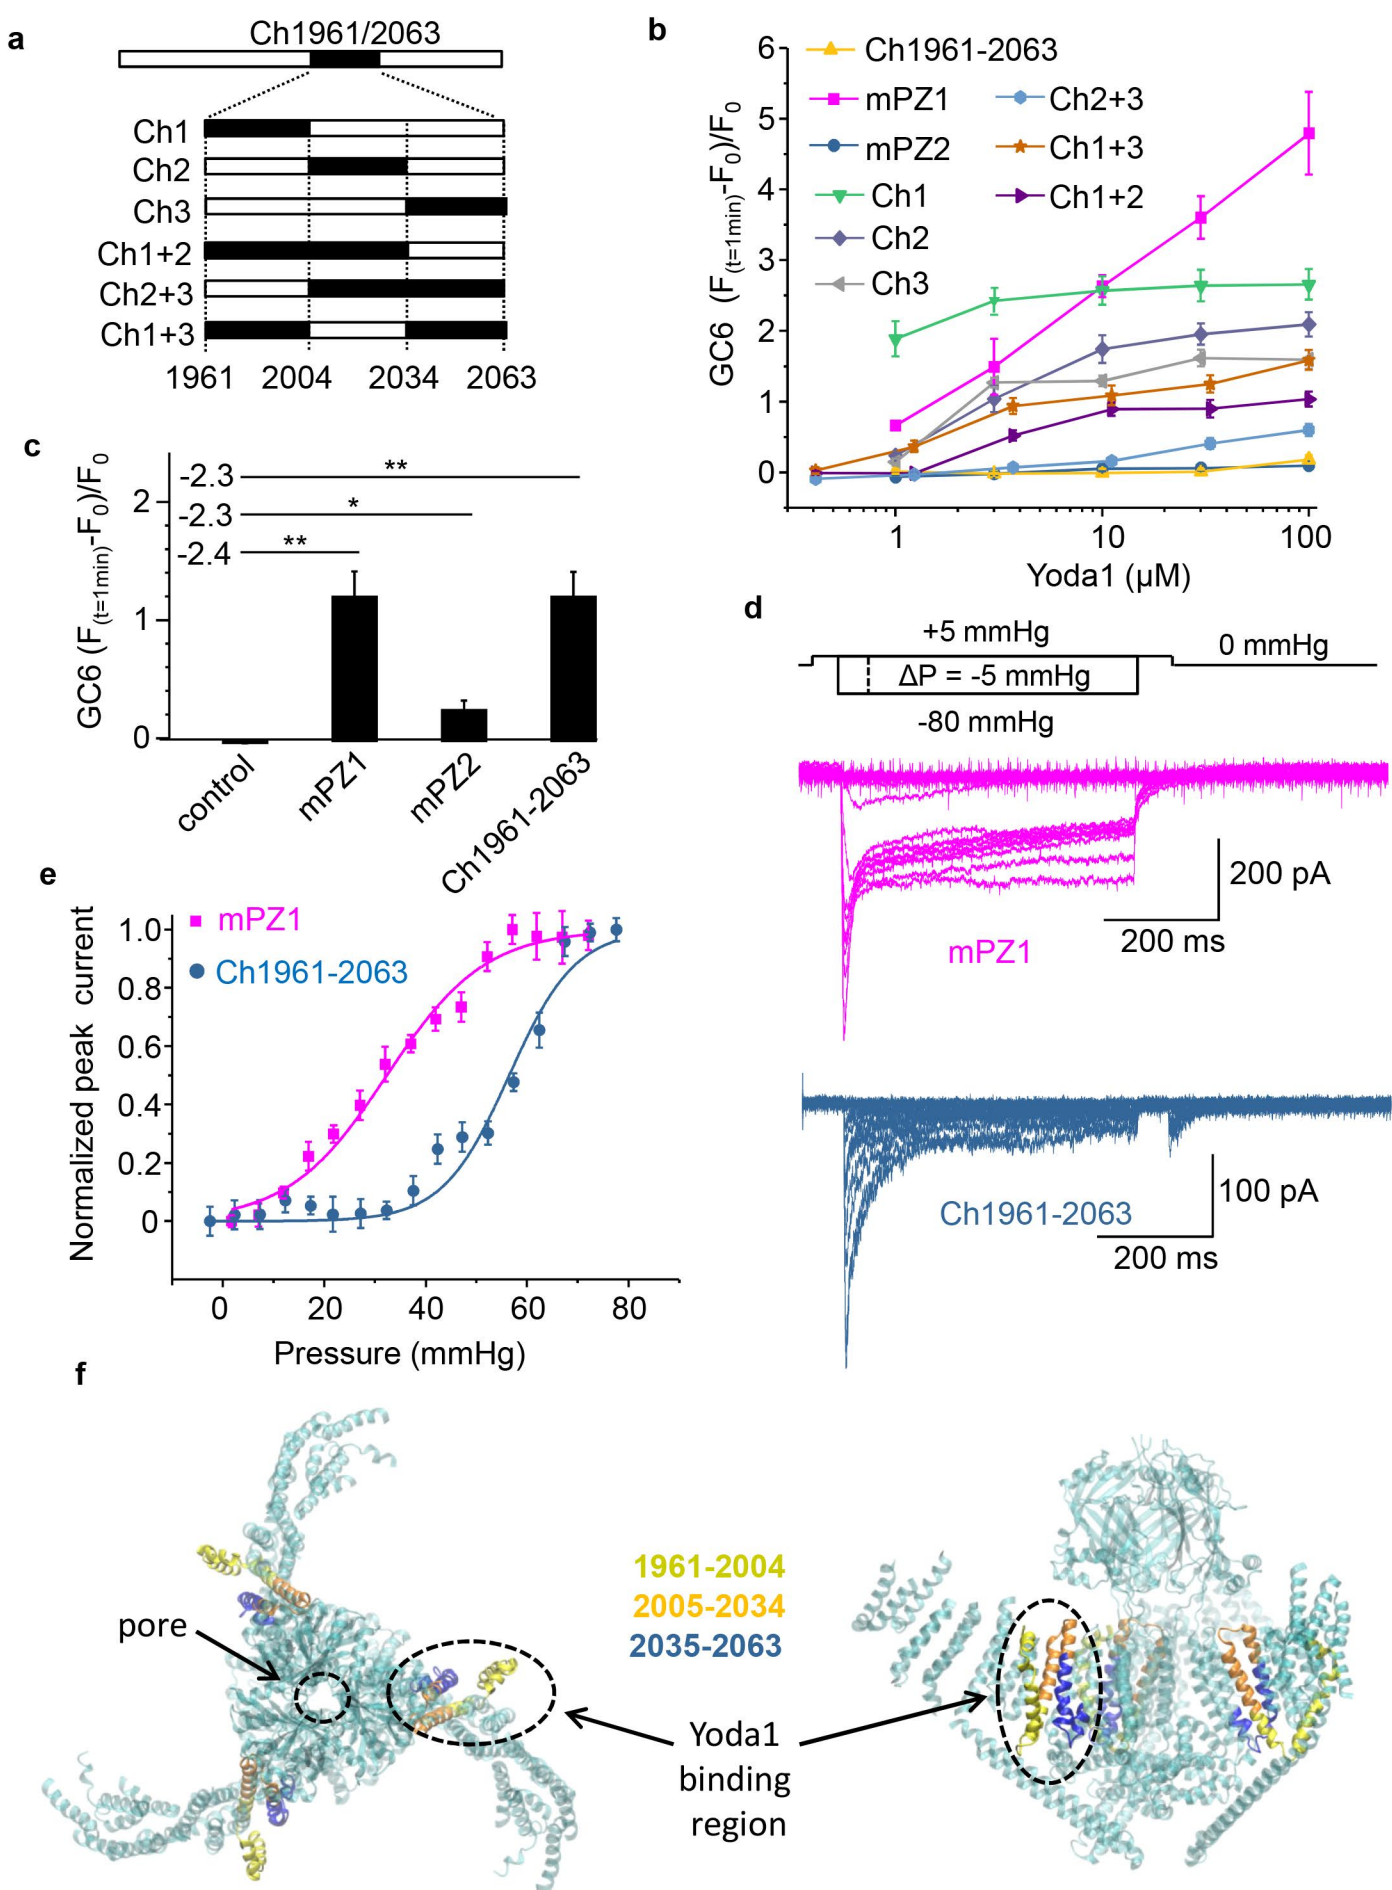

Source: http://biorxiv.org/content/10.1101/169516v1.full.pdf
